# Supplementary material for: Molecular Dynamics Simulations Reveal the Conformational Transition of GH33 Sialidases
Source: MDPI journal article supplement (doi:10.3390/ijms24076830), 2023-04-06
Supplement: s1 [file s1]

Supporting information

# Molecular Dynamics Simulations Reveal the Conformational Transition of GH33 Sialidases

Xueting Cao <sup>1</sup>, Xiao Yang <sup>2</sup>, Min Xiao <sup>1,2,\*</sup> and Xukai Jiang <sup>1,\*</sup>

<sup>1</sup> National Glycoengineering Research Center, Shandong Key Laboratory of Carbohydrate Chemistry and Glycobiology, NMPA Key Laboratory for Quality Research and Evaluation of Carbohydrate-Based Medicine, Shandong University, Qingdao 266237, China

<sup>2</sup> State Key Laboratory of Microbial Technology, Shandong University, Qingdao 266237, China

\* Correspondence: minxiao@sdu.edu.cn (M.X.); xukai.jiang@sdu.edu.cn (X.J.)

**Running title:** Conformational transition of GH33 sialidases

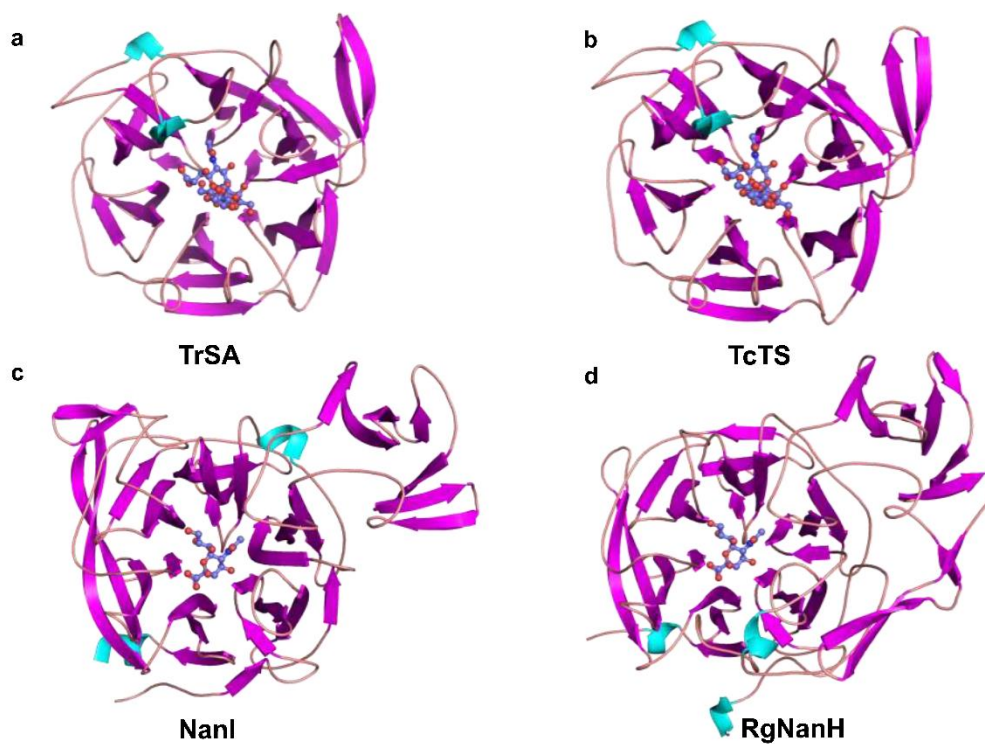

Figure S1. Active site structure of GH33 sialidases. The catalytic domains of GH33 sialidases consisting of a six-bladed  $\beta$ -propeller. The substrates are shown in ball-and-stick models.

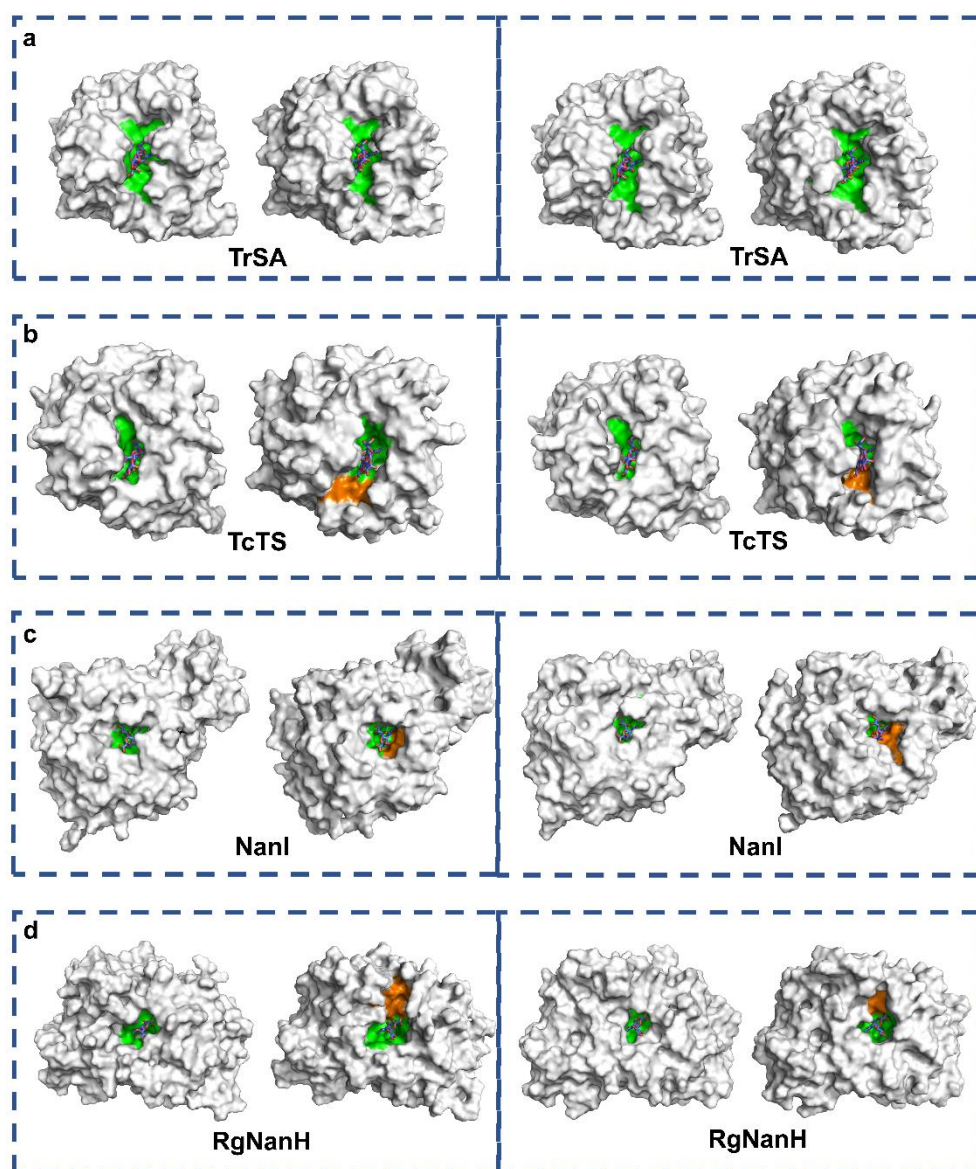

Figure S2. The conformational transition of GH33 sialidases in simulation replicas. The proteins are shown in surface models, the innate active site and the new cleft site of enzyme are shown in green and orange, respectively.

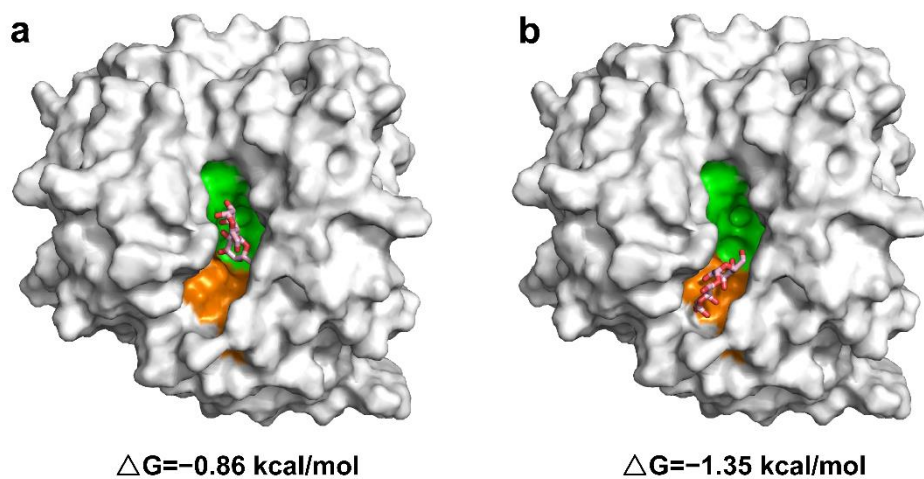

Figure S3. Molecular docking of the TcTS with lactose. TcTS is shown in surface models, the innate active site and the second active site of enzyme are shown in green and orange, respectively. Lactose is shown in pink sticks models.

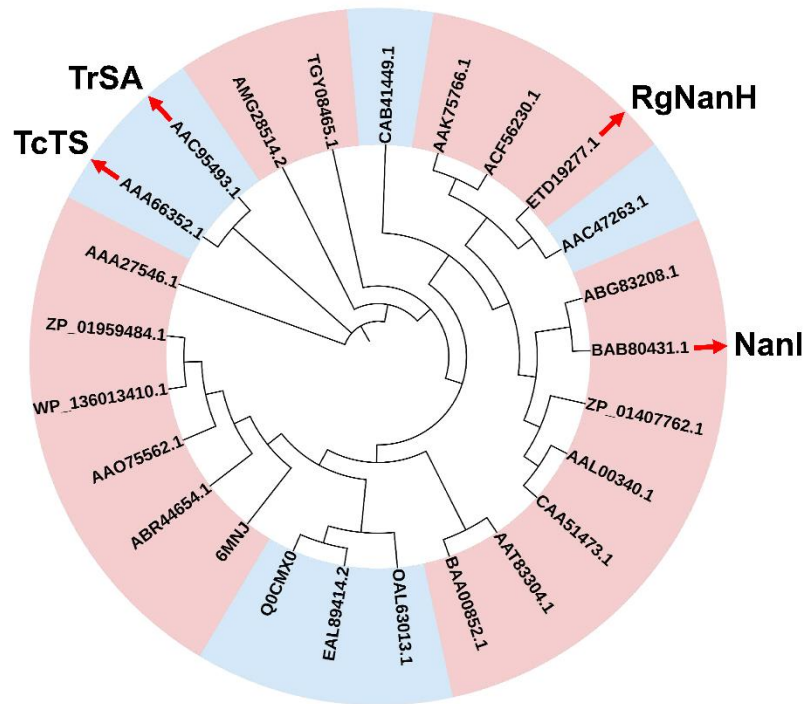

Figure S4. The phylogenetic tree of the GH33 family. Bacteria and eukaryota are highlighted by pink and blue, respectively. The evolutionary locations of four studied sialidases are marked.

**Table S1. The residues involved in hydrogen bond interactions with the substrate.**

| Enzyme-Substrate      | Hydrogen bond interactions involved residues |      |      |      |      |      |      |      |
|-----------------------|----------------------------------------------|------|------|------|------|------|------|------|
| TrSA-3'-Sialyllactose | 36R                                          | 54R  | 60D  | 97D  | 246R | 315R |      |      |
| TcTS-3'-Sialyllactose | 35R                                          | 53R  | 96D  | 119Y | 120W | 230E | 245R | 314R |
| NanI-Neu5Ac           | 266R                                         | 285R | 291D | 328D | 493Q | 555R | 615R | 655Y |
| RgNanH-Neu5Ac         | 257R                                         | 276R | 282D | 339D | 575R | 637R | 677Y |      |

**Table S2. Key active site residues of sialidases.**

| Enzyme | catalytic domain | carbohydrate-binding domain | Arg triad   | Tyr/Glu | Asp |
|--------|------------------|-----------------------------|-------------|---------|-----|
| TrSA   | residues 1-375   | residues 376-642            | 36/246/315  | 343/231 | 60  |
| TcTS   | residues 1-375   | residues 376-642            | 35/245/314  | 342/230 | 59  |
| NanI   | residues 243-694 | residues 1-242              | 266/555/615 | 655/539 | 291 |
| RgNanH | residues 235-723 | residues 1-234              | 257/575/637 | 677/559 | 282 |

**Table S3. Detailed information of molecular docking systems.**

| System                          | TcTS (innate active site)-Lactose | TcTS (new cleft)-Lactose |
|---------------------------------|-----------------------------------|--------------------------|
| Number of rotatable bonds       | 12                                | 12                       |
| Current Total Grid Pts per map  | 91125                             | 91125                    |
| Number of points in X-dimension | 44                                | 44                       |
| Number of points in Y-dimension | 44                                | 44                       |
| Number of points in Z-dimension | 44                                | 44                       |
| X-center                        | 70.801                            | 74.460                   |
| Y-center                        | 43.639                            | 50.086                   |
| Z-center                        | 54.171                            | 42.692                   |

Data analysis related formulas used in the present study.

RMSD is constructed using the following equation:

$$RMSD = \sqrt{\frac{1}{N} \sum_{i=1}^N \delta_i^2}$$

RMSF is constructed using the following equation:

$$RMSF = \sqrt{\frac{1}{T} \sum_{t_j=1}^T (x_i(t_j) - \tilde{x}_i)^2}$$

Lennard-Jones interaction energy is constructed using the following equation:

$$V_{LJ}(r_{ij}) = \frac{C_{ij}^{(12)}}{r_{ij}^{12}} - \frac{C_{ij}^{(6)}}{r_{ij}^6}$$

Coulomb interaction energy is constructed using the following equation:

$$V_c(r_{ij}) = f \frac{q_i q_j}{\epsilon_r r_{ij}}$$
